# Supplementary material for: Effect of Nonlinear Elasticity on the Swelling Behaviors of Highly Swollen Polyelectrolyte Gels
Source: MDPI journal article supplement (doi:10.3390/gels7010025), 2021-03-01
Supplement: s1 [file s1]

# Effect of Nonlinear Elasticity on the Swelling Behaviors of Highly Swollen Polyelectrolyte Gels

*Jian Tang<sup>1</sup>, Takuya Katashima<sup>1\*</sup>, Xiang Li<sup>2</sup>, Yoshiro Mitsukami<sup>3</sup>, Yuki Yokoyama<sup>3</sup>, Ung-il Chung<sup>1</sup>, Mitsuhiro Shibayama<sup>2</sup>, and Takamasa Sakai<sup>1\*</sup>*

## Contents

- 1. Overlapping polymer volume fraction of the blend system of Tetra-PAA and Tetra-PAA**
- 2. Relationship between the shear modulus in the as-prepared state and the concentration**
- 3. Calculation of  $I_m$**
- 4. Calculation of  $\Pi_{el}$  of the Gent model**

## 1. Overlapping polymer volume fraction of the blend system of Tetra-PAA and Tetra-PEG

The required quantities of Tetra-PAA-MA were dissolved in a citrate-phosphate buffer solution to obtain a polymer solution with concentrations ranging from 0 to 120 g L<sup>-1</sup>. The pH and ionic strength of the buffer solution were 5.9 and 100 mM, respectively. The effect of acrylic acid ionization was suppressed by applying the buffer solution as a solvent. The viscosity  $\eta$  of the polymer solution was measured using a rheometer (MCR301; Anton Paar, Graz, Austria) with a cone plate at a constant shear rate of 100 s<sup>-1</sup>, where the effect of the shear rate was confirmed to be negligible prior to the measurement. All experiments were performed at 25 °C. The specific viscosity,  $\eta_{sp}$ , was expressed as:

$$\eta_{sp} = \frac{\eta - \eta_0}{\eta_0} \quad (S-1)$$

where  $\eta_0$  is the viscosity of the buffer solution.

Supporting Figure 1 shows the specific viscosities  $\eta_{sp}$  of the Tetra-PAA-MA polymer solutions as a function of the polymer concentration. From the crossover of the two fitting lines, the  $C_{PAA}^*$  of the Tetra-PAA-MA polymer was estimated to be 60 g L<sup>-1</sup>, and the overlapping polymer volume fraction  $\phi_{PAA}^*$  was calculated to be 0.050. The Tetra-PAA-PEG gel was fabricated from Tetra-PAA-MA and Tetra-PEG-SH prepolymers. Thus, the blend overlapping polymer volume fraction  $\phi_{blend}^*$  of the Tetra-PAA-PEG gel was determined using the  $\phi^*$  and  $\phi$  values of the Tetra-PAA-MA and Tetra-PEG-SH prepolymers as follows:

$$\phi_{blend}^* = f_{PEG}\phi_{PEG}^* + f_{PAA}\phi_{PAA}^* \quad (S-2)$$

where  $\phi_{\text{PEG}}^*$  is the overlapping polymer volume fraction of the Tetra-PEG prepolymer, which was measured in our previous research; [1]  $f_{\text{PEG}}$  and  $f_{\text{PAA}}$  are the volume fractions of Tetra-PEG-SH and Tetra-PAA-MA to the total polymer volume, respectively.

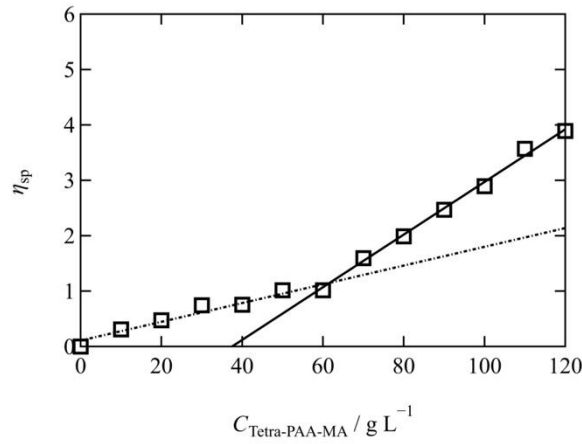

**Supporting Figure 1.** Specific viscosities of the Tetra-PAA-MA polymer solutions as a function of the polymer concentration. The overlapping concentration  $C^*$  was estimated to be the point at the intersection of the fitting lines of the lower and higher concentrations.

Supporting Table 1 shows the total polymer volume fraction  $\phi_{\text{total}}$  and the overlapping polymer volume fraction  $\phi_{\text{blend}}^*$  of the 10K, 20K, and 40K Tetra-PAA-PEG gels, respectively. The  $\phi_{\text{total}}$  of the 10K Tetra-PAA-PEG gel was smaller than that of  $\phi_{\text{blend}}^*$ , while the  $\phi_{\text{total}}$  of the 20K and 40K Tetra-PAA-PEG gel was slightly larger than  $\phi_{\text{blend}}^*$ .

**Supporting Table 1.** Polymer volume fractions ( $\phi_{\text{PEG}}$ ) of Tetra-PEG-SH, polymer volume fraction ( $\phi_{\text{PAA}}$ ) of Tetra-PAA-MA, total polymer volume fraction ( $\phi_{\text{total}}$ ) of the prepolymers inside the Tetra-PAA-PEG gels, and overlapping polymer volume fraction ( $\phi_{\text{blend}}^*$ ) of the 10K, 20K, and 40K tetra-PAA-PEG gels

|                       | $\phi_{\text{PEG}}$ [-] | $\phi_{\text{PAA}}$ [-] | $\phi_{\text{total}}$ [-] | $\phi_{\text{blend}}^*$ [-] |
|-----------------------|-------------------------|-------------------------|---------------------------|-----------------------------|
| 10K Tetra-PAA-PEG gel | 0.014                   | 0.025                   | 0.039                     | 0.054                       |
| 20K Tetra-PAA-PEG gel | 0.027                   | 0.025                   | 0.052                     | 0.042                       |
| 40K Tetra-PAA-PEG gel | 0.053                   | 0.024                   | 0.077                     | 0.025                       |

## 2. Relationship between the shear modulus in the as-prepared state and the concentration

According to our previous studies [2], the  $G_0$  value of the Tetra-PEG gel did not obey the simple rubber elasticity theories [1] due to the negative energetic contribution [3].

$G_0$  is given as:

$$G_0 = g(\nu - \mu) \quad (\text{S-3})$$

where  $\nu$  is the number per prepolymer of the elastically effective network strands,  $\mu$  is the number per prepolymer of the active crosslink, and  $g$  is a pre-factor related to the energetic contribution. Our previous studies suggested that  $g$  is a function of  $\phi/\phi^*$ , as shown in Supporting Figure 2.

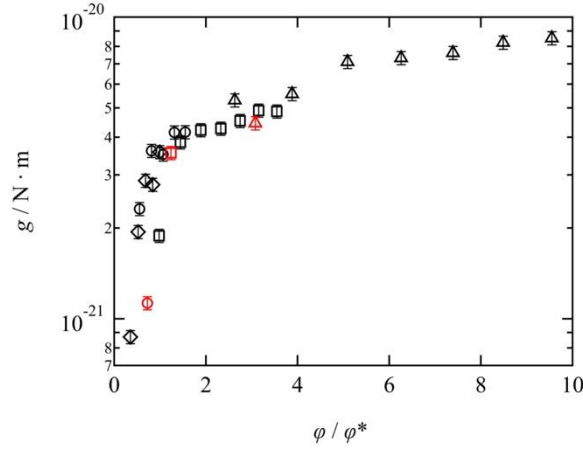

**Supporting Figure 2.** The value of  $g$  as a function of  $\phi/\phi^*$  for the Tetra-PEG gels (black: 5K, rhombus; 10K, circle; 20K, square; and 40K, triangle) and the Tetra-PAA-PEG gels (red: 10K, circle; 20K, square; and 40K, triangle). Data for the Tetra-PEG gels are replotted from Akagi et al. [2] with permission.

Supporting Figure 3 shows the reaction conversions of the 10K, 20K, and 40K Tetra-PAA-PEG gels, which ranged from 0.81 to 0.90. Adopting the Bethe approximation,  $\nu$  and  $\mu$  can be calculated as a function of the reaction conversion ( $p$ ) [4,5]. Under stoichiometric mixing conditions, the AB-type reaction can be replaced by presuming that the reaction is an AA-type reaction of the 4-armed prepolymer. Thus, the probability of one arm of a 4-armed prepolymer not being connected to the percolated network,  $P(F)$ , is expressed as:

$$P(F) = \left(\frac{1}{p} - \frac{3}{4}\right)^{\frac{1}{2}} - \frac{1}{2} \quad (\text{S-4})$$

Using equation (S-4), the probability of a 3-functional or 4-functional crosslink (i.e.,  $P(X_3)$  or  $P(X_4)$ ) can be derived from a 4-armed prepolymer as:

$$P(X_3) = \binom{4}{3} \cdot P(F) \cdot [1 - P(F)]^3 \quad (\text{S-5})$$

$$P(X_4) = [1 - P(F)]^4 \quad (\text{S-6})$$

Thus,  $\mu$  and  $\nu$  can be expressed as:

$$\mu = P(X_3) + P(X_4) \quad (\text{S-7})$$

$$\nu = \frac{3}{2} \cdot P(X_3) + 2 \cdot P(X_4) \quad (\text{S-8})$$

$g$  for the Tetra-PAA-PEG gel was obtained by inserting equations (S-7) and (S-8) into equation (S-3).

The obtained values of  $g$  are plotted in Supporting Figure 2, which obeys the master curve of the Tetra-PEG gels. These agreements support that observation that the reduction of  $G_0$  for the Tetra-PAA-PEG gels with shorter network lengths can be explained by the distance from  $\phi^*$ .

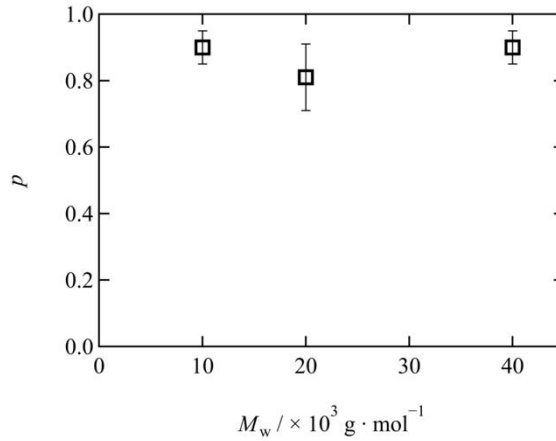

**Supporting Figure 3.** Reaction conversions ( $p$ ) for the 10K, 20K, and 40K Tetra-PAA-PEG gels.

### 3. Calculation of $I_m$

According to the classical concept of elastomers [6],  $I_m$  is the value of  $I_1$  at the ultimate deformation at which the network strands are fully stretched. Considering the

case in which the network strands are fully stretched, the uniaxial deformation ratio  $\alpha_{\max}$  is given as:

$$\alpha_{\max} = \frac{aN_e}{aN_e^{1/2}} = N_e^{1/2} \quad (\text{S-9})$$

where  $a$  is the Kuhn length and  $N_e$  is the segment number of the network strand between the neighboring elastically effective junctions. Under this condition, the invariant is expressed as follows:

$$I_m = \alpha_{\max}^2 + 2\alpha_{\max}^{-1} \quad (\text{S-10})$$

It should be noted that equation (S-10) assumes uniaxial deformation, while the value of  $I_m$  does not depend on the deformation type.

In this study, the  $N_e$  value of the Tetra-PAA-PEG gel was calculated as the sum of the PAA and PEG units:

$$N_e = \frac{M_{\text{PAA}}b_{\text{PAA}}}{4m_{\text{PAA}}a_{\text{PAA}}} + \frac{M_{\text{PEG}}b_{\text{PEG}}}{4m_{\text{PEG}}a_{\text{PEG}}} \quad (\text{S-11})$$

where  $M_{\text{PAA}}$  is the molecular weight of the Tetra-PAA-MA prepolymer,  $M_{\text{PEG}}$  is the molecular weight of the Tetra-PEG-SH prepolymer,  $m_{\text{PAA}}$  is the molecular weight of a monomeric PAA unit,  $m_{\text{PEG}}$  is the molecular weight of a monomeric PEG unit, and  $a_{\text{PAA}}$  and  $a_{\text{PEG}}$  are the Kuhn segment sizes of PAA and PEG, respectively. Substituting equations (S-9) and (S-11) into equation (S-10),  $I_m$  can be estimated. Supporting Table 2 summarizes the calculated results of  $N_e$ ,  $\alpha_{\max}$ , and  $I_m$ .

**Supporting Table 2.** The molecular masses of Tetra-PEG-SH ( $M_{\text{PEG}}$ ), of Tetra-PAA-MA ( $M_{\text{PAA}}$ ), the degree of polymerization between the neighboring elastically effective junctions of the polymer network ( $N_e$ ) of prepolymers inside the Tetra-PAA-PEG gels, the ultimate elongation ratio ( $\alpha_{\max}$ ), and the maximum value of  $I_1$  under the ultimate elongation ratio ( $I_m$ ) of the 10K, 20K, and 40K Tetra-PAA-PEG gels

| Sample                    | $M_{\text{PEG}}$ [g/mol] | $M_{\text{PAA}}$ [g/mol] | $N_e$ [-]         | $\alpha_{\text{max}}$ [-] | $I_m$ [-]         |
|---------------------------|--------------------------|--------------------------|-------------------|---------------------------|-------------------|
| 10K Tetra-PAA-<br>PEG gel | $1.0 \times 10^4$        | $1.9 \times 10^4$        | 53                | 7.3                       | 53                |
| 20K Tetra-PAA-<br>PEG gel | $2.0 \times 10^4$        | $1.9 \times 10^4$        | 81                | 9.0                       | 81                |
| 40K Tetra-PAA-<br>PEG gel | $4.0 \times 10^4$        | $1.9 \times 10^4$        | $1.4 \times 10^2$ | 12                        | $1.4 \times 10^2$ |

#### 4. Calculation of $\Pi_{\text{el}}$ of the Gent model

$\Pi_{\text{el}}$  is defined as a change in the elastic free energy ( $\Delta F_{\text{el}}$ ) when changing the number of solvent molecules ( $n_B$ ) with a constant number of polymers in the system ( $n_A$ ) and is expressed as:

$$\Pi_{\text{el}} = -\frac{1}{V_1} \left( \frac{\partial \Delta F_{\text{el}}}{\partial n_B} \right)_{n_A} \quad (\text{S-12})$$

where  $N_A$  is Avogadro's constant, and  $V_1$  is the molar volume of the solvent. Thus,  $N_A/V_1$  is the number of solvent molecules per unit volume. According to the Gent model, the elastic free energy  $\Delta F_{\text{el}}$  is expressed as:

$$\Delta F_{\text{el}} = -\frac{V_0 G_0}{2} (I_m - 3) \ln \left( 1 - \frac{I_1 - 3}{I_m - 3} \right) \quad (\text{S-13})$$

where  $G_0$  and  $V_0$  are the shear modulus and volume of the gel in the as-prepared state, respectively. In addition,  $I_1$  is the first invariant of Green's deformation tensor,  $I_m$  is the maximum value of  $I_1$  where the stress becomes infinite, and  $I_1$  is expressed as:

$$I_1 = \alpha_x^2 + \alpha_y^2 + \alpha_z^2 \quad (\text{S-14})$$

where  $\alpha_i$  is the elongation ratio in the  $i$  axis ( $i=x, y, z$ ) of the gel in the swollen state.



The elongation ratios are obtained by assuming isotropic deformation, which is given as:

$$\alpha_x = \alpha_y = \alpha_z = \alpha = Q^{\frac{1}{3}} = \left(\frac{V}{V_0}\right)^{\frac{1}{3}} \quad (\text{S-15})$$

where  $Q$  and  $V$  are the swelling ratio and volume in the swollen state, respectively.

Substituting equations (S-13), (S-14), and (S-15) into equation (S-12), the following equation is obtained:

$$\Pi_{\text{el}} = -\frac{1}{V_1} \left( \frac{\partial \Delta F_{\text{el}}}{\partial n_{\text{B}}} \right)_{n_{\text{A}}} = -\frac{1}{V_1} \left( \frac{\partial \Delta F_{\text{el}}}{\partial \alpha} \right)_{n_{\text{A}}} \left( \frac{\partial \alpha}{\partial n_{\text{B}}} \right)_{n_{\text{A}}} = -\frac{3\alpha V_0 G_0}{V_1} \frac{I_{\text{m}} - 3}{I_{\text{m}} - I_1} \left( \frac{\partial \alpha}{\partial n_{\text{B}}} \right)_{n_{\text{A}}} \quad (\text{S-16})$$

Here,

$$\alpha^3 = \frac{V}{V_0} = \frac{V_0 + n_{\text{B}} V_1}{V_0} \quad (\text{S-17})$$

Therefore,  $\Pi_{\text{el}}$  can be rewritten as

$$\Pi_{\text{el}} = -\frac{I_{\text{m}} - 3}{I_{\text{m}} - I_1} G_0 Q^{-\frac{1}{3}} \quad (\text{S-18})$$

In equation (S-18), the term  $G_0 Q^{-\frac{1}{3}}$  is equal to the shear modulus in the swollen state.

Thus,  $\Pi_{\text{el}}$  is experimentally validated by measuring the shear modulus.

## References

1. Akagi, Y.; Gong, J.P.; Chung, U.I.; Sakai, T. Transition Between Phantom and Affine Network Model Observed in Polymer Gels With Controlled Network Structure. *Macromolecules* **2013**, *46* (3), 1035–1040.
2. Yoshikawa, Y.; Sakumichi, N.; Chung, U.I.; Sakai, T. Connectivity Dependence of Gelation and Elasticity in AB-Type Polymerization: An Experimental Comparison of the Dynamic Process and Stoichiometrically Imbalanced Mixing. *Soft Matter* **2019**, *15* (25), 5017–5025.

3. Yoshikawa, Y.; Sakumichi, N.; Chung, U.; Sakai, T. Negative Energy Elasticity in a Rubber-Like Gel. *Phys. Rev. X* **2021**.
4. Macosko, C.W.; Miller, D.R. A New Derivation of Average Molecular Weights of Nonlinear Polymers. *Macromolecules* **1976**, *9* (2), 199–206.
5. Miller, D.R.; Macosko, C.W. A New Derivation of Post Gel Properties of Network Polymers. *Macromolecules* **1976**, *9* (2), 206–211.
6. Obukhov, S.P.; Rubinstein, M.; Colby, R.H. Network Modulus and Superelasticity. *Macromolecules* **1994**, *27* (12), 3191–3198.
